# Supplementary material for: Ultrahigh-efficiency photocatalysts based on mesoporous Pt–WO3 nanohybrids
Source: Royal Society of Chemistry journal article supplement (doi:10.1039/c3cp50647a), 2013-01-01
Supplement: c3cp50647a.pdf [file c3cp50647a.pdf]

## Supporting Information For:

# Ultrahigh-Efficiency Photocatalysts Based on Mesoporous Pt-WO<sub>3</sub> Nanohybrids

Zhenhai Wen,<sup>a, c</sup> Wei Wu,<sup>a, b</sup> Zhuang Liu,<sup>a</sup> Hao Zhang,<sup>a</sup> Jinghong Li<sup>\*a</sup>, Junhong Chen<sup>\*c</sup>

*a Beijing Key Laboratory for Analytical Methods and Instrumentation, Tsinghua University, Beijing 100084, China*

*b Key Laboratory of Jiangxi Province for Ecological Diagnosis-Remediation and Pollution Control, Nanchang Hangkong University, Nanchang 330063, Jiang Xi, China*

*c Department of Mechanical Engineering, University of Wisconsin-Milwaukee, 3200 North Cramer Street, Milwaukee, Wisconsin 53211, USA*

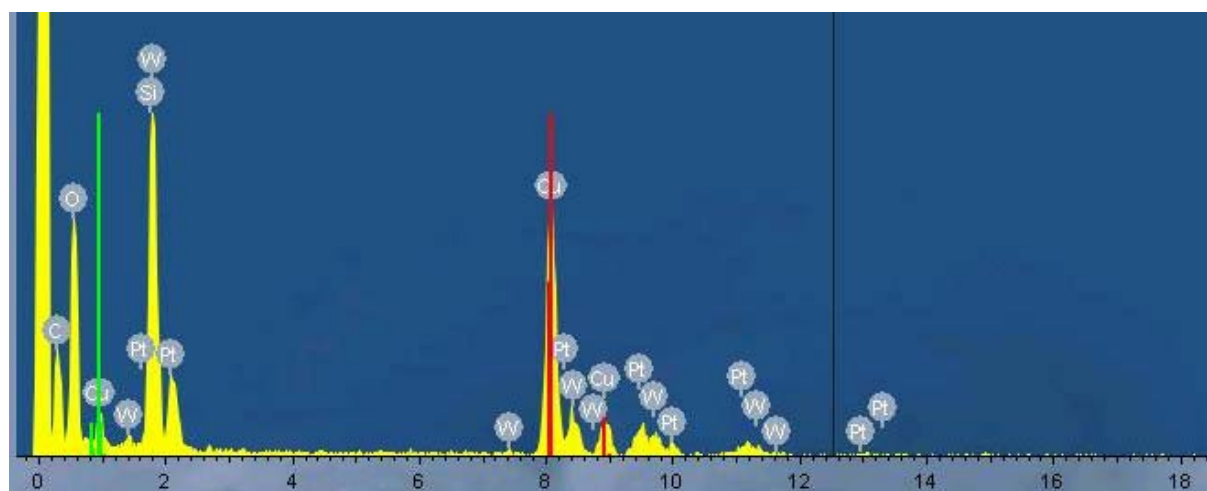

| Element | O K   | W L   | Pt L | Total  |
|---------|-------|-------|------|--------|
| wt. %   | 21.08 | 73.19 | 5.73 | 100.00 |

Figure S1. EDS of m-Pt/WO<sub>3</sub>.

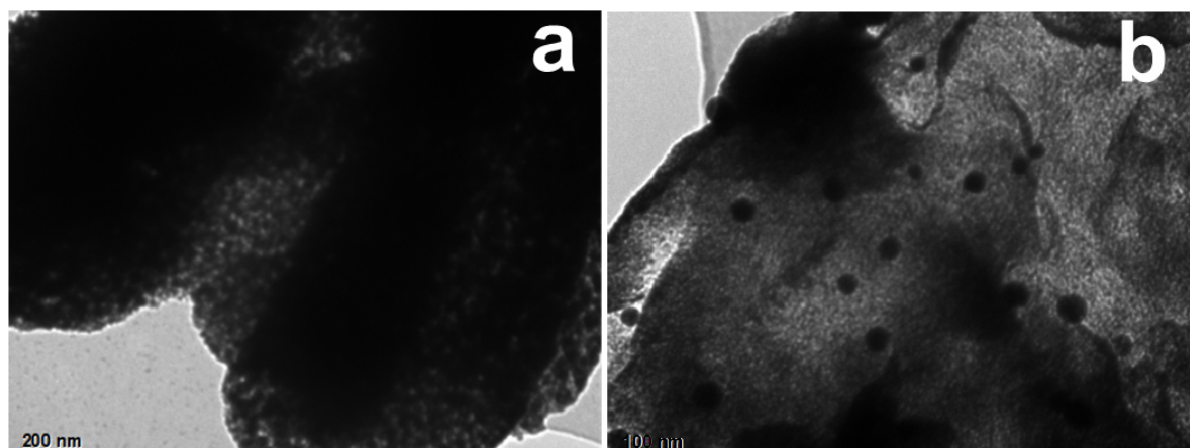

Figure S2. TEM image of mesoporous Pt/Fe<sub>2</sub>O<sub>3</sub> (a) and Ag/SnO<sub>2</sub> (b) nano hybrids, respectively.

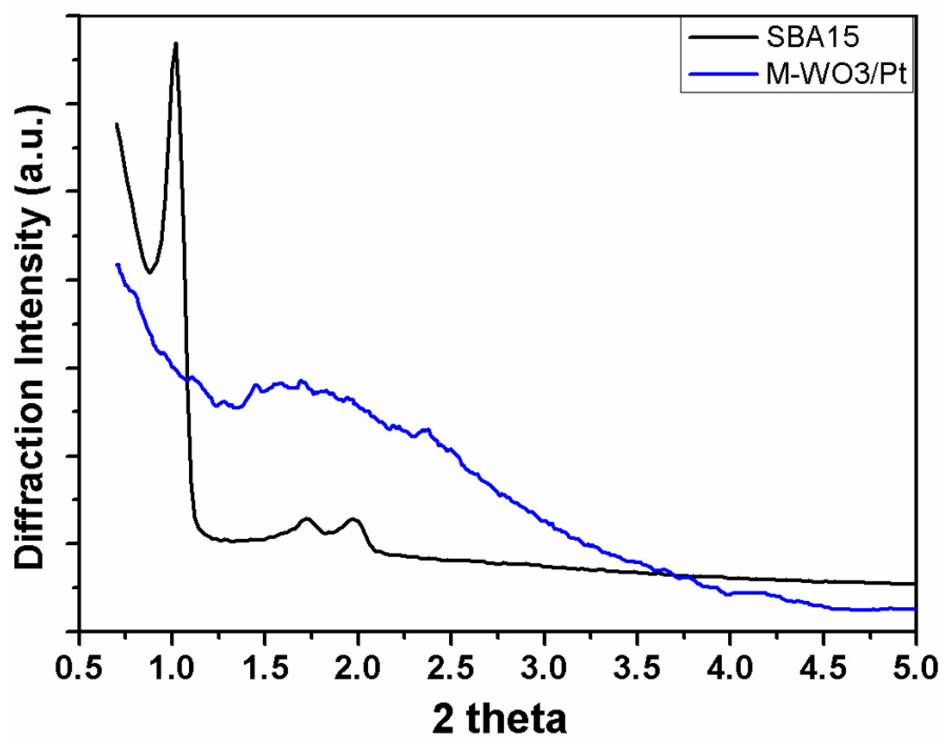

Figure S3. SAXRD patterns of SBA-15 (black) and m-Pt/WO<sub>3</sub> (blue).

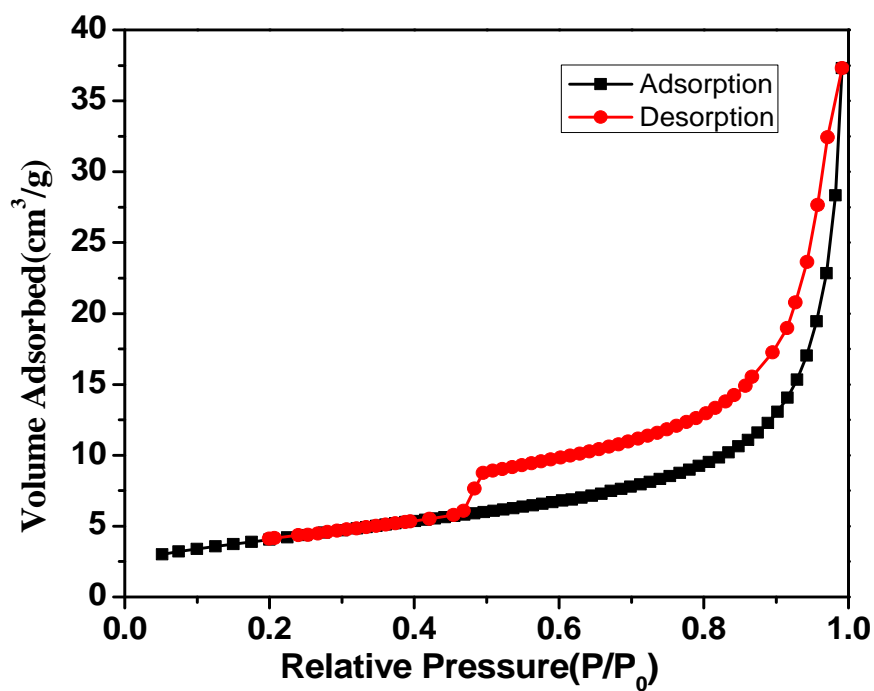

Figure S4. Nitrogen adsorption/desorption isotherms (inset) of m-Pt/WO<sub>3</sub> of Pt/bulk-WO<sub>3</sub>.

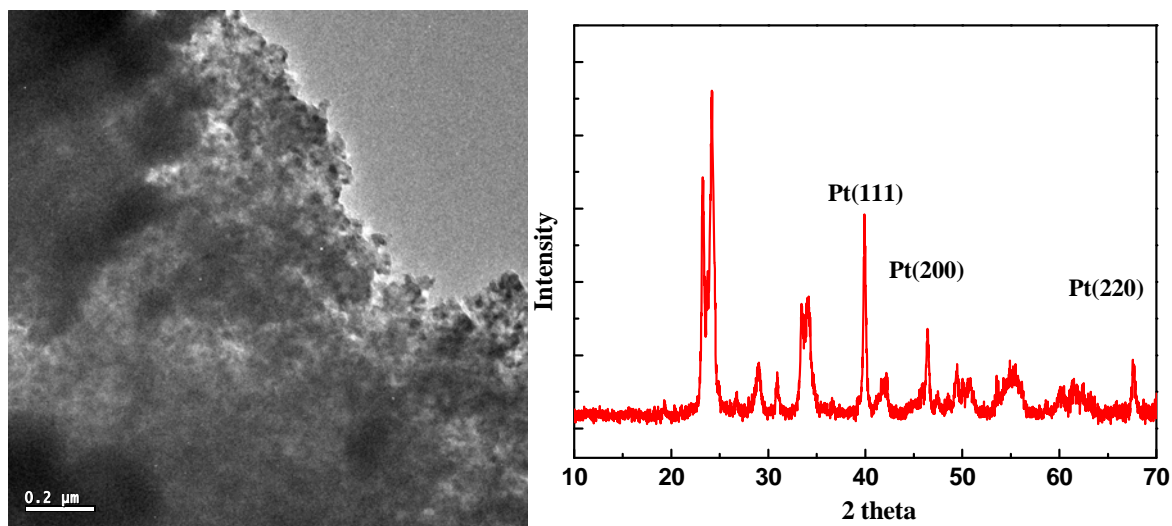

Figure S5. TEM image (up) and XRD pattern (down) of Pt/bulk-WO<sub>3</sub>.

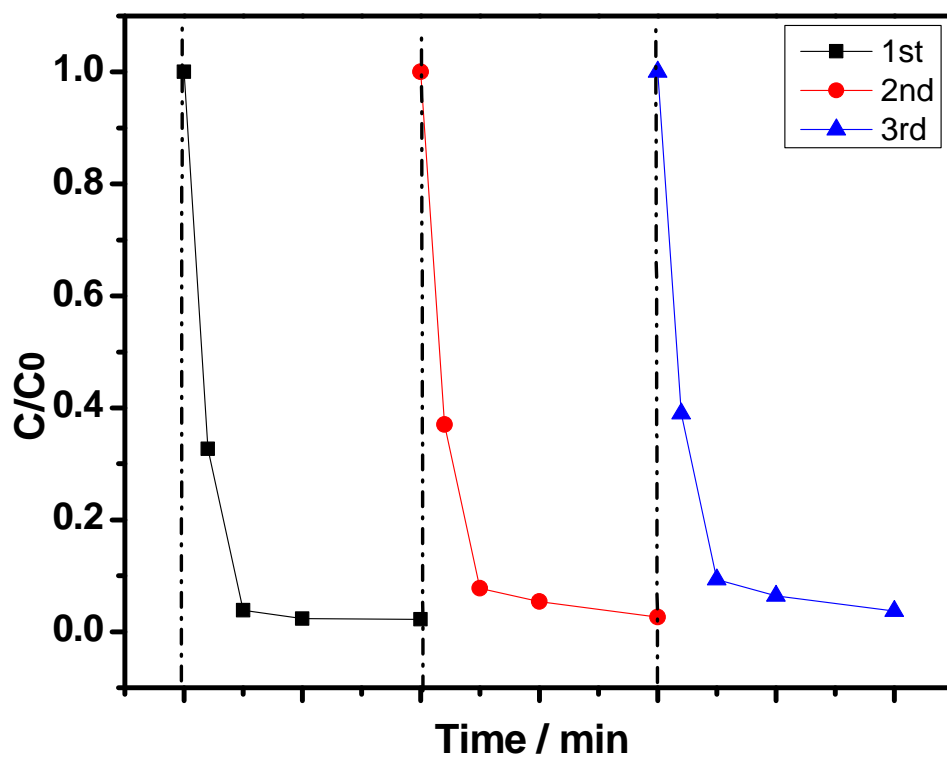

Figure S6. Concentration variation over three consecutive repeated running for the degradation of MB under visible light with m-Pt/WO<sub>3</sub> as the photocatalyst. (Note that the MB concentration was measured with a reaction time of 2, 5, 10, 20, 30 min for all three cycles.)
